# Supplementary material for: Density functional theory-based modeling of the half-metallic g-C3N4/CoN4 heterojunction for photocatalytic water splitting reaction
Source: Royal Society of Chemistry journal article supplement (doi:10.1039/d4cp00929k), 2024-01-01
Supplement: d4cp00929k1.pdf [file d4cp00929k1.pdf]

## Supporting information file

# Density Functional Theory-Based Modeling of Half Metallic g-C<sub>3</sub>N<sub>4</sub>/CoN<sub>4</sub> Heterojunction for Photocatalytic Water Splitting Reaction

*Dhilshada. V. N<sup>a</sup>, Aiswarya Chandran<sup>a</sup>, Sabyasachi Sen<sup>b</sup>, Mausumi Chattopadhyaya<sup>a\*</sup>*

<sup>a</sup>Department of Chemistry, National Institute of Technology, Calicut, Calicut Mukkam Road,  
Kattangal, Kerala 673601, India

<sup>b</sup>Department of Physics, Shyampur Siddheswari Mahavidyalaya, Ajodhya, Shyampur,  
Howrah, West Bengal 711312, India

## **List of contents:**

1. Table S1. Calculated energies of different magnetic states of CoN<sub>4</sub> bulk
2. Table S2. Calculated energies of the systems and surface energies ( $\gamma$ ) of slabs
3. Table S3. Calculated lattice mismatch ( $\delta$ ) of different structures
4. Table S4. Calculated energies of different configurations of g-C<sub>3</sub>N<sub>4</sub>/CoN<sub>4</sub> system
5. Table S5. Band gaps of CoN<sub>4</sub> bulk and g-C<sub>3</sub>N<sub>4</sub> using different methods
6. Computational methodology for calculating the band gap in presence of solvent
7. Input file for optimization of g-C<sub>3</sub>N<sub>4</sub>
8. Input file for the band structure calculation of g-C<sub>3</sub>N<sub>4</sub>
9. Input file for the PDOS calculation of g-C<sub>3</sub>N<sub>4</sub>
10. Input file for the work function calculation of g-C<sub>3</sub>N<sub>4</sub>
11. Input file for the optical property calculation of g-C<sub>3</sub>N<sub>4</sub>

**Table S1. Calculated energies of different magnetic states of CoN<sub>4</sub> bulk**

| System     | Nonmagnetic state | Ferromagnetic state | Anti-ferromagnetic state |
|------------|-------------------|---------------------|--------------------------|
| Energy(eV) | 0                 | -2.0                | -1.5                     |

**Table S2. Calculated energies of the systems and surface energies ( $\gamma$ ) of slabs.**

| System                             | g-C <sub>3</sub> N <sub>4</sub> ( 2× 2×1) | CoN <sub>4</sub> bulk |       |       | CoN <sub>4</sub> (111) slab<br>( $\sqrt{3} \times \sqrt{3} \times 1$ ) | g-C <sub>3</sub> N <sub>4</sub> /CoN <sub>4</sub> |
|------------------------------------|-------------------------------------------|-----------------------|-------|-------|------------------------------------------------------------------------|---------------------------------------------------|
| Energy(Ry)                         | -951.88                                   | -2987.11              |       |       | -2240.15                                                               | -3192.38                                          |
| Surface energy( J/m <sup>2</sup> ) |                                           | (100)                 | (110) | (111) |                                                                        |                                                   |
|                                    |                                           | 0.36                  | 0.37  | 0.11  |                                                                        |                                                   |

**Table S3. Calculated lattice mismatch ( $\delta$ ) of different structures**

| System                                                                                             | Lattice parameter of g-C <sub>3</sub> N <sub>4</sub> system (Å) | Lattice Parameter of CoN <sub>4</sub> system (Å) | Lattice mismatch (%) |
|----------------------------------------------------------------------------------------------------|-----------------------------------------------------------------|--------------------------------------------------|----------------------|
| 1×1×1 g-C <sub>3</sub> N <sub>4</sub> / 1×1×1 CoN <sub>4</sub> (111)                               | 7.2                                                             | 8.06                                             | 10                   |
| 1×1×1 g-C <sub>3</sub> N <sub>4</sub> / 2×2×1 CoN <sub>4</sub> (111)                               | 7.2                                                             | 16.12                                            | 55                   |
| 2×2×1 g-C <sub>3</sub> N <sub>4</sub> / 1×1×1 CoN <sub>4</sub> (111)                               | 14.4                                                            | 8.06                                             | 44                   |
| 2×2×1 g-C <sub>3</sub> N <sub>4</sub> / 2×2×1 CoN <sub>4</sub> (111)                               | 14.4                                                            | 16.12                                            | 10                   |
| $\sqrt{2} \times \sqrt{2} \times 1$ g-C <sub>3</sub> N <sub>4</sub> / 1×1×1 CoN <sub>4</sub> (111) | 10.08                                                           | 8.06                                             | 20                   |
| 1×1×1                                                                                              | 7.2                                                             | 11.3                                             | 36                   |

|                                                                                                                                                |             |              |                      |
|------------------------------------------------------------------------------------------------------------------------------------------------|-------------|--------------|----------------------|
| $g\text{-C}_3\text{N}_4 / \sqrt{2} \times \sqrt{2} \times 1$<br>CoN4(111)                                                                      |             |              |                      |
| $\sqrt{2} \times \sqrt{2} \times 1$ g-C <sub>3</sub> N <sub>4</sub> /<br>$\sqrt{2} \times \sqrt{2} \times 1$<br>CoN4(111)                      | 10.08       | 11.3         | 10                   |
| $\sqrt{3} \times \sqrt{3} \times 1$ g-C <sub>3</sub> N <sub>4</sub> /<br>$1 \times 1 \times 1$ CoN4(111)                                       | 12.45       | 8.06         | 35                   |
| $1 \times 1 \times 1$ g-C <sub>3</sub> N <sub>4</sub> / $\sqrt{3} \times$<br>$\sqrt{3} \times 1$ CoN4(111)                                     | 7.2         | 13.94        | 48                   |
| $\sqrt{3} \times \sqrt{3} \times 1$ g-C <sub>3</sub> N <sub>4</sub><br>/ $\sqrt{2} \times \sqrt{2} \times 1$<br>CoN4(111)                      | 12.45       | 11.3         | 9                    |
| $\sqrt{2} \times \sqrt{2} \times 1$ g-<br>C <sub>3</sub> N <sub>4</sub> / $\sqrt{3} \times \sqrt{3} \times 1$<br>CoN4(111)                     | 10.08       | 13.94        | 27                   |
| <b><math>2 \times 2 \times 1</math> g-C<sub>3</sub>N<sub>4</sub>/<math>\sqrt{3} \times</math><br/><math>\sqrt{3} \times 1</math> CoN4(111)</b> | <b>14.4</b> | <b>13.94</b> | <b>3<sup>#</sup></b> |
| $\sqrt{3} \times \sqrt{3} \times 1$ g-C <sub>3</sub> N <sub>4</sub><br>/ $2 \times 2 \times 1$ CoN4(111)                                       | 12.45       | 16.12        | 22                   |
| $\sqrt{3} \times \sqrt{3} \times 1$ g-<br>C <sub>3</sub> N <sub>4</sub> / $\sqrt{3} \times \sqrt{3} \times 1$<br>CoN4(111)                     | 12.45       | 13.94        | 11                   |

**#Lattice mismatch is least while considering  $2 \times 2 \times 1$  g-C<sub>3</sub>N<sub>4</sub>/ $\sqrt{3} \times \sqrt{3} \times 1$  CoN4(111).**

**Henceforth, this particular geometry was chosen in the present investigation.**

**Table S4. Calculated energies of different configurations of g-C<sub>3</sub>N<sub>4</sub>/CoN<sub>4</sub> system**

| System     | Co atoms are facing monolayer<br>g-C <sub>3</sub> N <sub>4</sub> | N atoms are facing monolayer g-<br>C <sub>3</sub> N <sub>4</sub> . |
|------------|------------------------------------------------------------------|--------------------------------------------------------------------|
| Energy(Ry) | -3192.38                                                         | -3192.22                                                           |

**Table S5. Band gaps of CoN<sub>4</sub> bulk and g-C<sub>3</sub>N<sub>4</sub> using different exchange-correlation functionals**

| System                                             | Band gap(eV) |       |       |        |                                                   |
|----------------------------------------------------|--------------|-------|-------|--------|---------------------------------------------------|
|                                                    | PBE          | PBE+U | HSE06 | R2SCAN | Reported Band gap                                 |
| g-C <sub>3</sub> N <sub>4</sub>                    | 1.31         | ----- | 2.9   | 1.80   | 2.65*(Experiment)<br>1.41(PBE)**<br>2.7(HSE06)*** |
| CoN <sub>4</sub> bulk                              | 2.6          | 3.19  | 4.55  | 4.63   | 2.56(PBE)****                                     |
| CoN <sub>4</sub> (111) slab                        | -----        | 2.37  | ----- | 2.99   | -----                                             |
| g-C <sub>3</sub> N <sub>4</sub> / CoN <sub>4</sub> | -----        | 1.81  | ----- | 2.22   | -----                                             |

\* Jiang, T.; Nan, F.; Zhou, J.; Zheng, F.; Weng, Y.; Cai, T.; Ju, S.; Xu, B.; Fang, L. *A.I.P. Adv.* **2019**, *9*, 055225.

\*\* A.M. Silva, M.I. Rojas, *Comput.Theor. Chem.* **2016**, *1098*, 41–49

\*\*\*Jianjun Liu, Enda Hua, *J. Phys. Chem. C* (2017) 121 25827-25835

\*\*\*\*Jun Deng, Ning Liu, JIANGANG Guo, Xiaolong Chen, *Phys. Rev B* (2019) 99 184409

## 6. Computational methodology for calculating the band gap in presence of solvent

The solvent related calculations were done using VASPsol<sup>1</sup> computational package, which integrates solvation into VASP through a self-consistent continuum model. VASPsol is widely used due to its ease of use and low computational costs, making it a valuable tool for chemical systems.<sup>3,4</sup> This approach incorporates DFT energy through two parameters. (i) The electrostatic interactions between solute and solvent molecules and (ii) the cavitation energy required to create the solute within the solvent. The expressions for these two terms are as follows:

$$E_{ele} = \int dr \varepsilon(r) \frac{|\nabla\varphi(r)|^2}{8\pi}$$

$$E_{vac} = \tau \int dr |\nabla S(r)|$$

$\varepsilon(r)$  represents the dielectric constant, which can be calculated using the equation

$$\varepsilon(r) = 1 + (\varepsilon_b - 1)S(r)$$

where  $\varepsilon_b$  is the dielectric constant for the bulk solvent.

The cavity shape function is given by

$$S(r) = \frac{1}{2} \operatorname{erfc} \left\{ \frac{\ln \left( \frac{\rho(r)}{\rho(c)} \right)}{\sigma\sqrt{2}} \right\}$$

The parameters  $\rho(r)$  and  $\rho(c)$  represent the electron density and cutoff electron density, respectively, while  $\sigma$  represents the cavity width. These parameters define the transition region

between the solute and solvent, where the dielectric constant changes smoothly from 1 to the bulk dielectric constant.

## Input files

### 7. Input file for optimization of g-C<sub>3</sub>N<sub>4</sub>(Quantum ESPRESSO)

**relax.in**

```
&CONTROL
  calculation = "relax"
  pseudo_dir = "."
/
&SYSTEM
  a      = 1.4400e+01
  c      = 2.00000e+01
  degauss = 1.00000e-02
  ecutwfc = 10.50000e+01
  ibrav  = 4
  nat    = 56
  ntyp   = 2
  occupations = "smearing"
  smearing = "gaussian"
  vdw_corr = "Grimme-D2"
/
&ELECTRONS
  startingpot = "atomic"
  startingwfc = "atomic+random"
/

&IONS
  ion_dynamics = "bfgs"
/
K_POINTS {automatic}
12 12 1 0 0 0

ATOMIC_SPECIES
N 14.00674 N.pbe-n-rrkjus_psl.1.0.0.UPF
C 12.01070 C.pbe-n-rrkjus_psl.1.0.0.UPF

ATOMIC_POSITIONS {angstrom}
N 4.817083 2.886329 9.140414
N 0.078283 2.886329 9.140414
C -1.152319 3.596817 9.140414
N -1.152317 5.017790 9.140414
N 2.539483 2.886329 9.140414
C 1.308881 3.596817 9.140414
N 1.308883 5.017790 9.140414
C 0.078281 5.728278 9.140414
N 3.678283 0.913869 9.140414
C 3.770081 3.596817 9.140414
N 3.770083 5.017790 9.140414
C 2.539481 5.728278 9.140414
```

|   |           |           |          |
|---|-----------|-----------|----------|
| N | 6.139483  | 0.913869  | 9.140414 |
| C | 4.908881  | 1.624357  | 9.140414 |
| N | 1.217083  | 9.121712  | 9.140414 |
| N | -3.521717 | 9.121712  | 9.140414 |
| C | -4.752319 | 9.832200  | 9.140414 |
| N | -4.752317 | 11.253173 | 9.140414 |
| N | -1.060517 | 9.121712  | 9.140414 |
| C | -2.291119 | 9.832200  | 9.140414 |
| N | -2.291117 | 11.253173 | 9.140414 |
| C | -3.521719 | 11.963661 | 9.140414 |
| N | 0.078283  | 7.149252  | 9.140414 |
| C | 0.170081  | 9.832200  | 9.140414 |
| N | 0.170083  | 11.253173 | 9.140414 |
| C | -1.060519 | 11.963661 | 9.140414 |
| N | 2.539483  | 7.149252  | 9.140414 |
| C | 1.308881  | 7.859740  | 9.140414 |
| N | 12.017083 | 2.886329  | 9.140414 |
| N | 7.278283  | 2.886329  | 9.140414 |
| C | 6.047681  | 3.596817  | 9.140414 |
| N | 6.047683  | 5.017790  | 9.140414 |
| N | 9.739483  | 2.886329  | 9.140414 |
| C | 8.508881  | 3.596817  | 9.140414 |
| N | 8.508883  | 5.017790  | 9.140414 |
| C | 7.278281  | 5.728278  | 9.140414 |
| N | 10.878283 | 0.913869  | 9.140414 |
| C | 10.970081 | 3.596817  | 9.140414 |
| N | 10.970083 | 5.017790  | 9.140414 |
| C | 9.739481  | 5.728278  | 9.140414 |
| N | 13.339483 | 0.913869  | 9.140414 |
| C | 12.108881 | 1.624357  | 9.140414 |
| N | 8.417083  | 9.121712  | 9.140414 |
| N | 3.678283  | 9.121712  | 9.140414 |
| C | 2.447681  | 9.832200  | 9.140414 |
| N | 2.447683  | 11.253173 | 9.140414 |
| N | 6.139483  | 9.121712  | 9.140414 |
| C | 4.908881  | 9.832200  | 9.140414 |
| N | 4.908883  | 11.253173 | 9.140414 |
| C | 3.678281  | 11.963661 | 9.140414 |
| N | 7.278283  | 7.149252  | 9.140414 |
| C | 7.370081  | 9.832200  | 9.140414 |
| N | 7.370083  | 11.253173 | 9.140414 |
| C | 6.139481  | 11.963661 | 9.140414 |
| N | 9.739483  | 7.149252  | 9.140414 |
| C | 8.508881  | 7.859740  | 9.140414 |

**8. Input files for the band structure calculation of g-C<sub>3</sub>N<sub>4</sub> using VASP involves 4 files (a) INCAR, (b) POSCAR, (c) KPOINTS and (d) POTCAR. All of these input files are pasted below:**

**a) INCAR**

## Global Parameters

ISTART = 1 (Read existing wavefunction; if there)  
# ICHARG = 11 (Non-self-consistent: GGA/LDA band structures)  
LREAL = Auto (Projection operators: automatic)  
ENCUT = 540 (Cut-off energy for plane wave basis set, in eV)  
PREC = Normal (Precision level)  
LWAVE = .TRUE. (Write WAVECAR or not)  
LCHARG = .TRUE. (Write CHGCAR or not)  
ADDGRID = .TRUE. (Increase grid; helps GGA convergence)

## Static Calculation

ISMear = 0 (tetrahedron method for DOS)  
LORBIT = 11 (PAW radii for projected DOS)  
NELM = 60 (Max electronic SCF steps)  
EDIFF = 1E-05 (SCF energy convergence; in eV)

METAGGA = R2SCAN

LASPH = .TRUE.

LMAXMIX = 4

**b) POSCAR**

## CIF

1.0

|               |               |               |
|---------------|---------------|---------------|
| 14.3999996185 | 0.0000000000  | 0.0000000000  |
| -7.1999998093 | 12.4707654841 | 0.0000000000  |
| 0.0000000000  | 0.0000000000  | 20.0000000000 |

N C

32 24

## Cartesian

|              |              |             |
|--------------|--------------|-------------|
| 4.901860441  | 2.935269099  | 9.140400290 |
| 0.130579158  | 2.969962609  | 9.140400290 |
| -1.053712865 | 5.021216564  | 9.140400290 |
| 2.473372799  | 2.970386671  | 9.140400290 |
| 1.302415217  | 5.014108237  | 9.140440226 |
| 3.718000576  | 0.814602853  | 9.140400290 |
| 3.658716033  | 5.022114489  | 9.140400290 |
| 6.087549358  | 0.815276296  | 9.140400290 |
| 1.301853670  | 9.170639205  | 9.140400290 |
| -3.469435123 | 9.205395154  | 9.140400290 |
| -4.653726931 | 11.256598934 | 9.140400290 |
| -1.126598567 | 9.205819587  | 9.140400290 |
| -2.297577606 | 11.249428912 | 9.140440226 |
| 0.118065688  | 7.049973330  | 9.140400290 |
| 0.058701752  | 11.257496859 | 9.140400290 |
| 2.487513619  | 7.050646774  | 9.140400290 |
| 12.101860250 | 2.935269099  | 9.140400290 |
| 7.330593773  | 2.969912807  | 9.140400290 |
| 6.146229653  | 5.021266366  | 9.140400290 |
| 9.673358232  | 2.970411572  | 9.140400290 |
| 8.502450861  | 5.014120502  | 9.140440226 |
| 10.918022165 | 0.814590402  | 9.140400290 |



|              |              |             |
|--------------|--------------|-------------|
| 10.858687089 | 5.022064687  | 9.140400290 |
| 13.287520414 | 0.815276296  | 9.140400290 |
| 8.501853050  | 9.170639205  | 9.140400290 |
| 3.730565115  | 9.205345351  | 9.140400290 |
| 2.546244125  | 11.256624207 | 9.140400290 |
| 6.073393947  | 9.205806950  | 9.140400290 |
| 4.902436794  | 11.249453442 | 9.140440226 |
| 7.318044039  | 7.049960694  | 9.140400290 |
| 7.258701132  | 11.257472330 | 9.140400290 |
| 9.687470084  | 7.050646774  | 9.140400290 |
| -1.001044688 | 3.684138328  | 9.140400290 |
| 1.302040781  | 3.614514191  | 9.140419960 |
| 0.090179942  | 5.713518736  | 9.140440226 |
| 3.605162191  | 3.684624828  | 9.140419960 |
| 2.514959912  | 5.714154643  | 9.140440226 |
| 4.902465601  | 1.437604880  | 9.140419960 |
| -4.601044593 | 9.919496169  | 9.140419960 |
| -2.297951828 | 9.849909198  | 9.140419960 |
| -3.509834340 | 11.948901478 | 9.140440226 |
| 0.005191469  | 9.919982298  | 9.140419960 |
| -1.085011024 | 11.949512484 | 9.140440226 |
| 1.302458347  | 7.673024881  | 9.140419960 |
| 6.198983767  | 3.684138328  | 9.140400290 |
| 8.502054967  | 3.614514191  | 9.140419960 |
| 7.290172455  | 5.713531001  | 9.140419960 |
| 10.805190968 | 3.684599927  | 9.140419960 |
| 9.714952855  | 5.714142006  | 9.140440226 |
| 12.102457954 | 1.437642325  | 9.140419960 |
| 2.598955324  | 9.919496169  | 9.140400290 |
| 4.902040256  | 9.849897305  | 9.140419960 |
| 3.690165040  | 11.948901478 | 9.140440226 |
| 7.205212736  | 9.919970405  | 9.140419960 |
| 6.114974623  | 11.949512484 | 9.140440226 |
| 8.502450861  | 7.673037518  | 9.140419960 |

**c) KPOINTS**

K-Path Generated by VASPKIT.

20

Line-Mode

Reciprocal

|              |              |              |       |
|--------------|--------------|--------------|-------|
| 0.0000000000 | 0.0000000000 | 0.0000000000 | GAMMA |
| 0.5000000000 | 0.0000000000 | 0.0000000000 | M     |
| 0.5000000000 | 0.0000000000 | 0.0000000000 | M     |
| 0.3333333333 | 0.3333333333 | 0.0000000000 | K     |
| 0.3333333333 | 0.3333333333 | 0.0000000000 | K     |
| 0.0000000000 | 0.0000000000 | 0.0000000000 | GAMMA |

**d) POTCAR contains pseudopotentials of Carbon and Nitrogen**

**9. Input files for the PDOS calculation of g-C<sub>3</sub>N<sub>4</sub> using VASP requires 4 files (a) INCAR, (b) POSCAR (c) KPOINTS and (d) POTCAR**

**a) INCAR**

Global Parameters

```
ISTART = 1      (Read existing wavefunction; if there)
LREAL = Auto    (Projection operators: automatic)
ENCUT = 540
NELM = 1000
EDIFF = 1E-5
PREC = Normal
ALGO = A
ISPIN = 2
LORBIT = 11
LWAVE = .TRUE.  (Write WAVECAR or not)
LCHARG = .TRUE. (Write CHGCAR or not)
SIGMA = 0.05
METAGGA = R2SCAN
LASPH = .TRUE.
LMAXMIX = 4
```

**b) POSCAR (same as band structure calculation)**

**c) KPOINTS**

```
k-points
0
Monkhorst-pack
12 12 1
0 0 0
```

**d) POTCAR contains pseudopotentials of Carbon and Nitrogen**

**10. Input files for the work function calculation of g-C<sub>3</sub>N<sub>4</sub> needs 3 files, (a) scf.in, (b) pp.in and (c) avg.in all of them are given below.**

**a) scf.in**

```
&CONTROL
  calculation = "scf"
  pseudo_dir = "."
  outdir      = "data"
  verbosity   = "high"
/
&SYSTEM
  a      = 1.4400e+01
  c      = 2.0000e+01
  degauss = 1.0000e-02
  ecutwfc = 10.5000e+01
 ibrav   = 4
  nat     = 56
  ntyp    = 2
  occupations = "smearing"
  smearing = "gaussian"
```

```

vdw_corr = "Grimme-D2"
/
&ELECTRONS
  startingpot = "atomic"
  startingwfc = "atomic+random"
/

K_POINTS {automatic}
12 12 1 0 0 0

ATOMIC_SPECIES
N 14.00674 N.pbe-n-rrkjus_psl.1.0.0.UPF
C 12.01070 C.pbe-n-rrkjus_psl.1.0.0.UPF

ATOMIC_POSITIONS (angstrom)
N 4.9018571031 2.9352663273 9.1404028751
N 0.1305810907 2.9699658975 9.1404000433
C -1.0010478436 3.6841346545 9.1404095881
N -1.0537186275 5.0212188802 9.1404030826
N 2.4733704285 2.9703894290 9.1404053092
C 1.3020471198 3.6145094129 9.1404261983
N 1.3024107533 5.0141056835 9.1404329964
C 0.0901823662 5.7135200753 9.1404317644
N 3.7180044075 0.8146032337 9.1404045642
C 3.6051630824 3.6846205373 9.1404210857
N 3.6587135913 5.0221093963 9.1404061216
C 2.5149669892 5.7141506483 9.1404305338
N 6.0875518926 0.8152825109 9.1404062546
C 4.9024634453 1.4376066175 9.1404174105
N 1.3018511808 9.1706402490 9.1404048993
N -3.4694306709 9.2053894499 9.1403995761
C -4.6010511019 9.9194951841 9.1404101286
N -4.6537265009 11.2566050821 9.1404015047
N -1.1265983403 9.2058203287 9.1404024292
C -2.2979470827 9.8499086432 9.1404253225
N -2.2975729614 11.2494253930 9.1404344347
C -3.5098406160 11.9489059014 9.1404309198
N 0.1180631452 7.0499710001 9.1404074318
C 0.0051983754 9.9199816570 9.1404211315
N 0.0587009543 11.2574951118 9.1404074851
C -1.0850118024 11.9495171142 9.1404317900
N 2.4875129849 7.0506428370 9.1404050870
C 1.3024565521 7.6730288717 9.1404184829
N 12.1018572516 2.9352691252 9.1404022407
N 7.3305891061 2.9699157822 9.1403983350
C 6.1989779477 3.6841428138 9.1404082020
N 6.1462325349 5.0212604007 9.1404001535
N 9.6733637277 2.9704126825 9.1404044066
C 8.5020579612 3.6145140636 9.1404254317
N 8.5024603119 5.0141159922 9.1404333567
C 7.2901793429 5.7135282307 9.1404299690
N 10.9180180274 0.8145964000 9.1404045674

```

|   |               |               |              |
|---|---------------|---------------|--------------|
| C | 10.8051857981 | 3.6846006530  | 9.1404204881 |
| N | 10.8586812840 | 5.0220665705  | 9.1404053746 |
| C | 9.7149577188  | 5.7141380628  | 9.1404302798 |
| N | 13.2875199628 | 0.8152783623  | 9.1404040116 |
| C | 12.1024578335 | 1.4376374982  | 9.1404162147 |
| N | 8.5018585724  | 9.1706418905  | 9.1404058239 |
| N | 3.7305711886  | 9.2053466440  | 9.1403992092 |
| C | 2.5989479541  | 9.9195007761  | 9.1404096802 |
| N | 2.5462476268  | 11.2566184157 | 9.1404022993 |
| N | 6.0733910975  | 9.2058028800  | 9.1404067976 |
| C | 4.9020476238  | 9.8498956732  | 9.1404261043 |
| N | 4.9024373508  | 11.2494497001 | 9.1404323361 |
| C | 3.6901581224  | 11.9489061263 | 9.1404301736 |
| N | 7.3180456839  | 7.0499594169  | 9.1404047912 |
| C | 7.2052042812  | 9.9199751994  | 9.1404234997 |
| N | 7.2586990475  | 11.2574746546 | 9.1404085843 |
| C | 6.1149761874  | 11.9495177645 | 9.1404308248 |
| N | 9.6874727202  | 7.0506485032  | 9.1404046869 |
| C | 8.5024538198  | 7.6730355903  | 9.1404177064 |

**b) pp.in**

```

&inputPP
  outdir='.',
  plot_num=11
  filplot = 'gc3n4l100.pot'
/
&plot
  iflag=3,
  output_format=5,
/

```

**c) avg.in**

```

1
gc3n4l100.pot
1.D0
1440
3
3.835000000

```

## 11. Input file for the optical property calculation of g-C<sub>3</sub>N<sub>4</sub> using CASTEP

task : ElectronicSpectroscopy

spectral\_task : Optics  
continuation : default  
xc\_functional : PBE  
sedc\_apply : true  
sedc\_scheme : G06  
spin\_polarized : false  
opt\_strategy : Default  
page\_wvfns : 0  
cut\_off\_energy : 500.0000000000000000  
grid\_scale : 1.5000000000000000  
fine\_grid\_scale : 1.5000000000000000  
finite\_basis\_corr : 0  
elec\_energy\_tol : 2.0000000000000000e-06  
max\_scf\_cycles : 1000  
fix\_occupancy : false  
metals\_method : EDFT  
num\_occ\_cycles : 6  
nextra\_bands : 7  
smearing\_width : 0.1000000000000000  
num\_dump\_cycles : 0  
spectral\_nbands : 120  
spectral\_eigenvalue\_tol : 1.0000000000000000e-05  
calculate\_stress : false  
calculate ELF : false  
popn\_calculate : false  
calculate\_hirshfeld : false  
calculate\_densdiff : false  
pdos\_calculate\_weights : false  
spectral\_write\_eigenvalues : true

## References

- [1] K. Mathew, R. Sundararaman, K. Letchworth-Weaver, T.A. Arias, R.G. Hennig, *J. Chem. Phys.* (2014) 140.
- [2] J. Han, Y. Kim, H.W. Kim, D.H.K. Jackson, D. Lee, H. Chang, H.J. Chae, K.Y. Lee, H.J. Kim, *Electrochem. Commun.* 83 (2017) 46–50.
- [3] M.C. Groenenboom, R.M. Anderson, D.J. Horton, Y. Basdogan, D.F. Roeper, S.A. Policastro, J.A. Keith, *J. Phys. Chem. C* 121 (2017) 16825–16830.
